# Supplementary material for: Tiling Array Analysis of UV Treated Escherichia coli Predicts Novel Differentially Expressed Small Peptides
Source: PubMed Central journal article supplement (PMC3009722; doi:10.1371/journal.pone.0015356), 2010-12-23
Supplement: pone.0015356.s001.pdf [file pone.0015356.s001.pdf]

**Table 1** Differentially expressed genes, Mock vs UV treated cells

| Gene | Forward               | Reverse                     |
|------|-----------------------|-----------------------------|
| lexA | AGAAGGGTTGCCGCTGGTA   | TTGCGCCAGAAGTGGTTCA         |
| tisB | ACCTGGTGGATATCGCCATTC | CTTCAGGTATTTTCAGAACAGCATCAA |
| sulA | GCTCTCCCCTTGCCACACT   | TGTAATTGCCCGTGCGTAAA        |

**Table 2** Endogenous control gene

| Gene | Forward                | Reverse              |
|------|------------------------|----------------------|
| rrsB | CGTGTTGTGAAATGTTGGGTAA | CCGCTGGCAACAAAGGATAA |

**Table 3** Candidate differentially expressed intergenic regions & primers used, Mock vs UV treated cells

| Candidate no. | Start nucleotide | Stop Nucleotide | Strand | Forward                     | Reverse                    |
|---------------|------------------|-----------------|--------|-----------------------------|----------------------------|
| istR1/istR2   | 3851175          | 3851327         | -      | CAAACGCAAACCTGTGATCGA       | CGCAATTCGGCACGAAT          |
| nc1           | 4457486          | 4457627         | -      | AATTGTCGTTGAGGGTTCCA        | TCAGTTCGGCGTCATTTGC        |
| nc2           | 2342424          | 2342513         | -      | TCAGTTGTGGTCAATATATAAGCGAAT | GGCTTAGCATTTAACAATAACCGAAT |
| nc3           | 1225459          | 1225561         | +      | CCCTTGTCAATCAACCCATTG       | GCGGAAAAAGGAAGCGTAAA       |
